# Supplementary material for: Dietary Protein Source Influences Brain Inflammation and Memory in a Male Senescence-Accelerated Mouse Model of Dementia
Source: Springer Nature journal article supplement (doi:10.1007/s12035-020-02191-y), 2020-11-09
Supplement: MOESM1 [file 12035_2020_2191_MOESM1_ESM.docx]

***SUPPLEMENTARY MATERIALS***

**Dietary protein source influences brain inflammation and memory in a male senescence-accelerated mouse model of dementia**

Sabrina Petralla1, Cristina Parenti1, Valentina Ravaioli1, Irene Fancello1, Francesca Massenzio1, Marco Virgili1, Barbara Monti1, Emiliano Pena-Altamira1*#.

1 Department of Pharmacy and Biotechnology, University of Bologna, Bologna, Italy

# Present address: Maurice Wohl Clinical Neuroscience Institute, Basic and Clinical Neuroscience Department, King’s College London, London, UK.

* corresponding author

Correspondence should be sent to: luis_emiliano.pena_altamira@kcl.ac.uk

Keywords: diet, ageing, dementia, neuroinflammation, cognition.

Declarations of interest: none

**SUPPLEMENTARY MATERIALS AND METHODS**

**Behavioural testing: fear conditioning**

Four-month old male SAMP8 mice were subject to fear conditioning testing by using an Ugo Basile inhibitory avoidance apparatus (Gemonio, Italy). A total of 6 animals per dietary group were tested. We followed a previously published fear conditioning protocol [37]. The transparent lid allowed mice to be observed during the experiment. Mice explored the chamber for a total of 7 minutes. On day 1, mice explored the context for 3 minutes before receiving a single electrical foot-shock (0.5 mA for 3 seconds) and remained in the chamber for an additional 4 minutes. Twenty-four hours after the learning procedure (day 2), mice were once again put into the lit chamber. The freezing behaviour, defined as the lack of any movement besides breathing, was scored by two independent observers every 5 seconds during a 2-minute interval.

**Statistics**

Fear conditioning results were analysed by using two-way ANOVA followed by Tukey’s *post-hoc* test comparing the dietary groups, as the first factor, and the behavioural test as the second one (before conditioning *vs* after conditioning), as previously reported by Bambah-Mukku [36] and Contestabile [37]. All statistical analyses were performed with GraphPad Prism 4. All results are expressed as the mean ± standard error and defined statistically significant when p < 0.05.

**SUPPLEMENTARY TABLES**

**Supplementary table 1:** Composition of the diets used in this study

| **Grams** | **Soy protein isolate diet** | **Pea protein isolate diet** | **Casein protein isolate diet** | **Beef protein isolate diet** |
| --- | --- | --- | --- | --- |
| Corn starch | 60.0 | 60.0 | 60.0 | 60.0 |
| Soy protein isolate | 20 | - | - | - |
| Pea protein isolate |  | 24 | - | - |
| Casein protein isolate | - | - | 22.5 | - |
| Beef protein isolate | - | - | - | 18.6 |
| Peanut oil | 5.0 | 5.0 | 5.0 | 5.0 |
| Wheat bran | 10.0 | 10.0 | 10.0 | 10.0 |
| Vitamin and mineral mixture | 1.0 | 1.0 | 1.0 | 1.0 |
| Water | 4.0 | 0.0 | 1.5 | 5.4 |
| Total | 100.0 | 100.0 | 100.0 | 100.0 |

**Supplementary table 2**. Essential amino acid content of the protein isolates used in this study

| **Essential amminoacid (EAA)** | **Soy protein EAA content per 100g** | **Casein protein EAA content per 100g** | **Casein vs soy protein EAA content %** | **Pea protein EAA content per 100g** | **Pea vs soy protein EAA content %** | **Beef protein EAA content per 100g** | **Beef vs soy protein EAA content %** |
| --- | --- | --- | --- | --- | --- | --- | --- |
| Histidine | 2.3 | 2.1 | 91% | 1.5 | 65% | 1 | 43% |
| Isoleucine | 4 | 4.1 | 103% | 3.8 | 95% | 1.8 | 45% |
| Leucine | 6.6 | 7.7 | 117% | 6.6 | 100% | 3.8 | 58% |
| Lysine | 5.2 | 6.3 | 121% | 6.3 | 121% | 3.9 | 75% |
| Methionine | 1.1 | 2 | 182% | 0.6 | 55% | 0.9 | 82% |
| Phenylalanine | 4.5 | 3.7 | 82% | 4 | 89% | 2.5 | 56% |
| Threonine | 3 | 3.3 | 110% | 2.6 | 87% | 2.1 | 70% |
| Tryptophan | 1.1 | 1 | 91% | 0.6 | 55% | 0.2 | 18% |
| Valine | 4.2 | 5 | 119% | 7.5 | 179% | 3 | 71% |

**Supplementary table 3**. Primary and secondary antibodies used for Western Blot analysis

| **Primary antibody** | **Dilution primary antibody** | **Secondary antibody** | **Dilution secondary antibody** |
| --- | --- | --- | --- |
| Iba1 ab48004 (Abcam) | 1:1000 | donkey anti-goat IgG HRP sc-2020 (Santa Cruz Biotechnology) | 1:2000 |
| TREM2 sc-48765 (Santa Cruz Biotechnology) | 1:1000 | Goat anti-rabbit IgG HRP sc-2004 (Santa Cruz Biotechnology) | 1:2000 |
| CX3CL1 TP237 (Torrey Pines Biolabs) | 1:1000 | Goat anti-rabbit IgG HRP sc-2004 (Santa Cruz Biotechnology) | 1:2000 |
| GFAP Z334 (Dako) | 1:1000 | Goat anti-rabbit IgG HRP sc-2004 (Santa Cruz Biotechnology) | 1:2000 |
| TNF-alpha sc-1349 (Santa Cruz Biotechnology) | 1:1000 | donkey anti-goat IgG HRP sc-2020 (Santa Cruz Biotechnology) | 1:2000 |
| Olig2 sc-48817 (Santa Cruz Biotechnology) | 1:1000 | Goat anti-rabbit IgG HRP sc-2004 (Santa Cruz Biotechnology) | 1:2000 |
| MAG sc-15324 (Santa Cruz Biotechnology) | 1:1000 | Goat anti-rabbit IgG HRP sc-2004 (Santa Cruz Biotechnology) | 1:2000 |
| BDNF sc-546 (Santa Cruz Biotechnology) | 1:1000 | Goat anti-rabbit IgG HRP sc-2004 (Santa Cruz Biotechnology) | 1:2000 |
| TGFβ1 sc-146 (Santa Cruz Biotechnology) | 1:1000 | Goat anti-rabbit IgG HRP sc-2004 (Santa Cruz Biotechnology) | 1:2000 |
| TGFβ2 sc-90 (Santa Cruz Biotechnology) | 1:1000 | Goat anti-rabbit IgG HRP sc-2004 (Santa Cruz Biotechnology) | 1:2000 |
| TGFβRI sc-398 (Santa Cruz Biotechnology) | 1:1000 | Goat anti-rabbit IgG HRP sc-2004 (Santa Cruz Biotechnology) | 1:2000 |
| TGFβRII sc-17792 (Santa Cruz Biotechnology) | 1:1000 | Goat anti-mouse IgG HRP sc-2005 (Santa Cruz Biotechnology) | 1:2000 |
| AMPK sc-74461 (Santa Cruz Biotechnology) | 1:1000 | Goat anti-mouse IgG HRP sc-2005 (Santa Cruz Biotechnology) | 1:2000 |
| LC3B sc-271625 (Santa Cruz Biotechnology) | 1:1000 | Goat anti-mouse IgG HRP sc-2005 (Santa Cruz Biotechnology) | 1:2000 |
| GAPDH sc-32233 (Santa Cruz Biotechnology) | 1:20000 | Goat anti-mouse IgG HRP sc-2005 (Santa Cruz Biotechnology) | 1:2000 |

**Supplementary table 4**. Primary and secondary antibodies used for Immunofluorescence analysis

| **Primary antibody** | **Dilution primary antibody** | **Secondary antibody** | **Dilution secondary antibody** |
| --- | --- | --- | --- |
| Iba1 ab48004 (Abcam) | 1:500 | Donkey anti-goat Alexa 555 (Abcam) | 1:500 |
| GFAP Z334 (Dako) | 1:1000 | Goat anti-rabbit Alexa 488 (Abcam) | 1:500 |
| Olig2 sc-48817 (Santa Cruz Biotechnology) | 1:1000 | Goat anti-rabbit Alexa 488 (Abcam) | 1:500 |
| DCX ab18723 (Abcam) | 1:1000 | Goat anti-rabbit Alexa 488 (Abcam) | 1:500 |

**Supplementary table 5**. Protein expression in each brain region obtained by Western Blot analysis; - = no change.

| **protein** | **region** | **pea vs soy** | **Statistically**  **Significant** | **casein vs soy** | **Statistically**  **Significant** | **beef vs soy** | **Statistically**  **Significant** |
| --- | --- | --- | --- | --- | --- | --- | --- |
| **IBA1** | Cx | increase | no | increase | no | increase | no |
| Hip | - | - | **increase** | **yes** | - | - |
| **TREM2** | Cx | - | - | **decrease** | **yes** | **decrease** | **yes** |
| Hip | - | - | decrease | no | decrease | no |
| **CX3CL1** | Cx | increase | no | **decrease** | **yes** | **decrease** | **yes** |
| Hip | increase | no | - | - | increase | no |
| **TNFA** | Cx | decrease | no | - | - | increase | no |
| Hip | decrease | no | **increase** | **yes** | increase | no |
| **GFAP** | Cx | decrease | no | increase | no | decrease | no |
| Hip | decrease | no | - | - | - | - |
| **OLIG2** | Cx | - | - | **decrease** | **yes** | **decrease** | **yes** |
| Hip | - | - | increase | no | increase | no |
| **MAG** | Cx | - | - | **decrease** | **yes** | **decrease** | **yes** |
| Hip | decrease | no | **decrease** | **yes** | decrease | no |
| **BDNF** | Cx | increase | no | decrease | no | - | - |
| Hip | increase | no | - | - | - | - |
| **TGFB1** | Cx | **increase** | **yes** | - | - | - | - |
| Hip | - | - | decrease | no | decrease | no |
| **TGFB2** | Cx | - | - | - | - | decrease | no |
| Hip | - | - | decrease | no | - | - |
| **TGFBR1** | Cx | increase | no | - | - | - | - |
| Hip | - | - | **increase** | **yes** | **increase** | **yes** |
| **TGFBR2** | Cx | - | - | - | - | - | - |
| Hip | increase | no | increase | no | increase | no |
| **AMPK** | Cx | - | - | decrease | no | **decrease** | **yes** |
| Hip | increase | no | increase | no | - | - |
| **LC3B** | Cx | - | - | - | - | **decrease** | **yes** |
| Hip | **increase** | **yes** | - | - | - | - |

**Supplementary table 6**. Protein expression in each brain region obtained by Immunofluorescence analysis; - = no change.

| **protein** | **region** | **casein vs soy** | **Statistically**  **Significant** |
| --- | --- | --- | --- |
| **IBA1** | Cx | decrease | no |
| Hip | **increase** | **yes** |
| **GFAP** | Cx | **increase** | **yes** |
| Hip | - | - |
| **OLIG2** | Cx | increase | no |
| Hip | **increase** | **yes** |
| **DCX** | Cx | - | - |
| Hip | decrease | no |
